# Supplementary material for: In Vitro Synergistic Activity of Antimicrobial Combinations against Carbapenem- and Colistin-Resistant Acinetobacter baumannii and Klebsiella pneumoniae
Source: MDPI journal article supplement (doi:10.3390/antibiotics12010093), 2023-01-05
Supplement: s1 [file s1]

## Supplementary material

**Supplementary Table S1.** Results of antimicrobial combinations tested for *A. baumannii*. FICI: fractional inhibitory concentration index; sy: synergy; ad: additivity; in: indifference; an: antagonism.

| <i>A. baumannii</i><br>isolate<br>accession<br>number | <u>Antimicrobial combination</u>              |    |                                                |    |                                                |    |
|-------------------------------------------------------|-----------------------------------------------|----|------------------------------------------------|----|------------------------------------------------|----|
|                                                       | colistin + meropenem<br>FICI (interpretation) |    | colistin + rifampicin<br>FICI (interpretation) |    | colistin + daptomycin<br>FICI (interpretation) |    |
| 67538                                                 | 0.282                                         | sy | 0.182                                          | sy |                                                |    |
| 227561                                                | 0.469                                         | sy | 0.465                                          | sy | 0.260                                          | sy |
| 76511                                                 | 0.141                                         | sy | 0.087                                          | sy |                                                |    |
| 90009                                                 | 0.030                                         | sy | 0.130                                          | sy | 0.190                                          | sy |
| 33391                                                 | 0.201                                         | sy |                                                |    |                                                |    |
| 117554                                                | 0.040                                         | sy | 0.070                                          | sy | 0.030                                          | sy |
| 3793                                                  | 0.313                                         | sy | 0.135                                          | sy | 0.258                                          | sy |
| 131000                                                | 0.050                                         | sy | 0.100                                          | sy | 0.020                                          | sy |
| 100847                                                | 0.313                                         | sy | 0.066                                          | sy |                                                |    |
| 120567                                                | 0.375                                         | sy | 0.125                                          | sy |                                                |    |
| 197616                                                | 0.047                                         | sy | 0.006                                          | sy | 0.066                                          | sy |
| 232959                                                | 0.281                                         | sy | 0.563                                          | ad | 0.266                                          | sy |
| 65780                                                 | 0.140                                         | sy | 0.158                                          | sy | 0.190                                          | sy |
| 118411                                                | 0.080                                         | sy | 0.070                                          | sy | 0.050                                          | sy |
| 3626                                                  | 0.468                                         | sy | 0.280                                          | sy | 0.387                                          | sy |
| 229383                                                | 0.500                                         | sy | 0.313                                          | sy | 0.310                                          | sy |
| 31463                                                 | 0.022                                         | sy | 0.172                                          | sy | 0.200                                          | sy |
| 189928                                                | 0.008                                         | sy | 0.078                                          | sy |                                                |    |
| 123900                                                | 0.500                                         | sy | 0.127                                          | sy |                                                |    |
| 143702                                                | 0.250                                         | sy |                                                |    |                                                |    |
| 263605                                                | 0.310                                         | sy | 0.440                                          | sy | 0.385                                          | sy |
| 236413                                                | 0.313                                         | sy | 0.625                                          | ad | 0.500                                          | sy |
| 79534                                                 | 0.016                                         | sy | 0.104                                          | sy | 0.105                                          | sy |
| 267318                                                | 0.469                                         | sy | 0.500                                          | sy | 0.198                                          | sy |
| 130692                                                | 0.469                                         | sy |                                                |    |                                                |    |
| 95924                                                 | 0.010                                         | sy | 0.100                                          | sy | 0.050                                          | sy |
| 95890                                                 | 0.107                                         | sy | 0.104                                          | sy |                                                |    |
| 142010                                                | 0.469                                         | sy |                                                |    |                                                |    |
| 270332                                                | 0.325                                         | sy | 0.313                                          | sy | 0.250                                          | sy |
| 111940                                                | 0.100                                         | sy | 0.050                                          | sy | 0.030                                          | sy |
| 263832                                                | 0.470                                         | sy | 0.300                                          | sy | 0.500                                          | sy |
| 96495                                                 | 0.125                                         | sy | 0.049                                          | sy |                                                |    |
| 171482                                                | 0.094                                         | sy |                                                |    |                                                |    |
| 144145                                                | 0.375                                         | sy |                                                |    |                                                |    |
| 31100                                                 | 0.020                                         | sy | 0.420                                          | sy | 0.140                                          | sy |
| 84693                                                 | 0.094                                         | sy | 0.141                                          | sy | 0.398                                          | sy |
| 105788                                                | 0.040                                         | sy | 0.100                                          | sy | 0.020                                          | sy |
| 151812                                                | 0.313                                         | sy |                                                |    |                                                |    |
| 260699                                                | 0.500                                         | sy | 0.844                                          | ad | 0.200                                          | sy |
| 90065                                                 | 0.059                                         | sy | 0.087                                          | sy |                                                |    |
| 203083                                                | 0.015                                         | sy | 0.007                                          | sy | 0.097                                          | sy |
| 153247                                                | 0.313                                         | sy |                                                |    |                                                |    |
| 238043                                                | 0.060                                         | sy | 0.070                                          | sy | 0.100                                          | sy |
| 131040                                                | 0.050                                         | sy | 0.050                                          | sy | 0.030                                          | sy |
| 58521                                                 | 0.250                                         | sy | 0.421                                          | sy | 0.140                                          | sy |
| 104710                                                | 0.040                                         | sy | 0.050                                          | sy | 0.030                                          | sy |
| 272393                                                | 0.500                                         | sy | 0.422                                          | sy | 0.280                                          | sy |

|         |       |    |       |    |       |    |
|---------|-------|----|-------|----|-------|----|
| 52315   | 0.107 | sy |       |    |       |    |
| 270328  | 0.375 | sy | 0.437 | sy | 0.385 | sy |
| 263393  | 0.190 | sy | 0.520 | ad | 0.140 | sy |
| 223177  | 0.469 | sy | 0.107 | sy |       |    |
| 113303  | 0.188 | sy | 0.049 | sy |       |    |
| 148812  | 0.050 | sy | 0.500 | sy | 0.030 | sy |
| 139070  | 0.250 | sy |       |    |       |    |
| 229283  | 0.188 | sy | 0.469 | sy | 0.266 | sy |
| 133520  | 0.500 | sy | 0.100 | sy | 0.050 | sy |
| 70751   | 0.116 | sy | 0.197 | sy | 0.002 | sy |
| 268862  | 0.094 | sy | 0.438 | sy | 0.258 | sy |
| 263547  | 0.188 | sy | 0.395 | sy | 0.199 | sy |
| 43676   | 0.023 | sy | 0.400 | sy | 0.200 | sy |
| 190505  | 0.008 | sy | 0.002 | sy | 0.035 | sy |
| 32038   | 0.046 | sy | 0.256 | sy | 0.140 | sy |
| 125054  | 0.500 | sy | 0.145 | sy |       |    |
| 232904  | 0.188 | sy | 0.396 | sy | 0.105 | sy |
| 86086   | 0.281 | sy | 0.094 | sy |       |    |
| 224302  | 0.188 | sy | 0.049 | sy |       |    |
| 95895   | 0.047 | sy | 0.057 | sy |       |    |
| 92139   | 0.035 | sy | 0.395 | sy | 0.199 | sy |
| 204909  | 0.024 | sy | 0.005 | sy |       |    |
| 197610  | 0.016 | sy | 0.010 | sy | 0.105 | sy |
| 197809  | 0.094 | sy | 0.002 | sy | 0.422 | sy |
| 270325  | 0.313 | sy | 0.375 | sy | 0.385 | sy |
| 31983   | 0.058 | sy | 0.240 | sy | 0.250 | sy |
| 60026   | 0.125 | sy | 0.280 | sy | 0.051 | sy |
| 30768   | 0.034 | sy | 0.469 | sy | 0.190 | sy |
| 110420  | 0.030 | sy | 0.200 | sy | 0.030 | sy |
| 125740  | 0.125 | sy |       |    |       |    |
| 185612  | 0.016 | sy | 0.020 | sy | 0.035 | sy |
| 65534   | 0.250 | sy | 0.420 | sy | 0.070 | sy |
| 275944  | 0.469 | sy | 0.198 | sy | 0.198 | sy |
| 176461  | 0.039 | sy |       |    |       |    |
| 277734  | 0.563 | ad | 0.795 | ad | 0.265 | sy |
| 201158  | 0.031 | sy | 0.064 | sy | 0.018 | sy |
| 51352   | 0.313 | sy | 0.375 | sy | 0.258 | sy |
| 89286   | 0.078 | sy | 0.111 | sy |       |    |
| 72340   | 0.140 | sy | 0.188 | sy | 0.190 | sy |
| 191991  | 0.001 | sy | 0.020 | sy | 0.035 | sy |
| 275939  | 0.375 | sy | 0.123 | sy | 0.203 | sy |
| 197624  | 0.003 | sy | 0.026 | sy | 0.035 | sy |
| 75867   | 0.375 | sy | 0.343 | sy | 0.200 | sy |
| 278773  | 0.468 | sy | 0.257 | sy | 0.257 | sy |
| 275380  | 0.250 | sy | 0.563 | ad | 0.105 | sy |
| 180180  | 0.080 | sy | 0.050 | sy | 0.050 | sy |
| 196677  | 0.035 | sy | 0.037 | sy | 0.127 | sy |
| 197874  | 0.016 | sy | 0.022 | sy | 0.053 | sy |
| 179117  | 0.031 | sy | 0.127 | sy |       |    |
| 1009533 | 0.469 | sy | 0.470 | sy | 0.265 | sy |
| 2381    | 0.187 | sy | 0.375 | sy | 0.199 | sy |
| 277736  | 0.563 | ad | 0.465 | sy | 0.386 | sy |
| 86077   | 0.070 | sy | 0.104 | sy |       |    |
| 125361  | 0.020 | sy | 0.050 | sy | 0.020 | sy |
| 187704  | 0.094 | sy | 0.003 | sy | 0.035 | sy |
| 272364  | 0.220 | sy | 0.375 | sy | 0.375 | sy |
| 226213  | 0.375 | sy | 0.281 | sy | 0.266 | sy |
| 134571  | 0.020 | sy | 0.100 | sy | 0.020 | sy |

|         |       |    |       |    |       |    |
|---------|-------|----|-------|----|-------|----|
| 89101   | 0.070 | sy | 0.071 | sy |       |    |
| 189794  | 0.031 | sy | 0.018 | sy | 0.035 | sy |
| 236499  | 0.313 | sy |       |    |       |    |
| 30192   | 0.281 | sy |       |    |       |    |
| 259994  | 0.281 | sy | 0.469 | sy | 0.260 | sy |
| 121035  | 0.040 | sy | 0.300 | sy | 0.030 | sy |
| 277735  | 0.313 | sy | 0.437 | sy | 0.258 | sy |
| 112461  | 0.313 | sy | 0.071 | sy |       |    |
| 279644  | 0.375 | sy | 0.688 | ad | 0.398 | sy |
| 279922  | 0.469 | sy | 0.469 | sy | 0.386 | sy |
| 29283   | 0.110 | sy | 0.465 | sy | 0.500 | sy |
| 270284  | 0.500 | sy | 0.310 | sy | 0.203 | sy |
| 127132  | 0.020 | sy | 0.020 | sy | 0.020 | sy |
| 198386  | 0.020 | sy | 0.012 | sy | 0.129 | sy |
| 113448  | 0.313 | sy | 0.094 | sy |       |    |
| 102488  | 0.188 | sy | 0.049 | sy |       |    |
| 192722  | 0.003 | sy | 0.005 | sy | 0.026 | sy |
| 90601   | 0.141 | sy | 0.104 | sy |       |    |
| 97373   | 0.125 | sy | 0.186 | sy |       |    |
| 114294  | 0.125 | sy | 0.049 | sy |       |    |
| 1015    | 0.375 | sy | 0.917 | ad | 0.398 | sy |
| 270330  | 0.469 | sy | 0.469 | sy | 0.327 | sy |
| 181282  | 0.015 | sy | 0.012 | sy |       |    |
| 117201  | 0.281 | sy | 0.039 | sy |       |    |
| 90620   | 0.107 | sy | 0.138 | sy |       |    |
| 1010672 | 0.375 | sy | 0.844 | ad | 0.267 | sy |
| 126245  | 0.500 | sy |       |    |       |    |
| 44922   | 0.046 | sy | 0.281 | sy | 0.210 | sy |
| 97054   | 0.469 | sy | 0.073 | sy |       |    |
| 27419   | 0.036 | sy | 0.460 | sy | 0.200 | sy |
| 93496   | 0.107 | sy | 0.125 | sy |       |    |
| 124031  | 0.375 | sy |       |    |       |    |
| 72358   | 0.148 | sy | 0.084 | sy |       |    |
| 6311    | 0.258 | sy | 0.258 | sy | 0.258 | sy |
| 197942  | 0.039 | sy | 0.009 | sy | 0.258 | sy |
| 27416   | 0.100 | sy | 0.469 | sy | 0.265 | sy |
| 44532   | 0.281 | sy | 0.159 | sy |       |    |
| 192492  | 0.012 | sy | 0.050 | sy | 0.070 | sy |
| 99296   | 0.125 | sy | 0.049 | sy |       |    |
| 225334  | 0.281 | sy | 0.180 | sy |       |    |
| 44863   | 0.201 | sy | 0.111 | sy |       |    |
| 31977   | 0.300 | sy | 0.465 | sy | 0.265 | sy |
| 79413   | 0.281 | sy | 0.104 | sy |       |    |
| 31632   | 0.110 | sy | 0.465 | sy | 0.265 | sy |
| 36685   | 0.140 | sy | 0.437 | sy | 0.265 | sy |
| 190352  | 0.031 | sy | 0.005 | sy | 0.070 | sy |
| 176209  | 0.031 | sy |       |    |       |    |
| 48759   |       |    | 0.460 | sy | 0.258 | sy |
| 257357  | 0.375 | sy |       |    | 0.422 | sy |
| 258542  | 0.375 | sy |       |    | 0.422 | sy |
| 288824  | 0.281 | sy | 0.437 | sy | 0.387 | sy |
| 82510   | 0.023 | sy | 0.094 | sy | 0.133 | sy |
| 131253  | 0.060 | sy | 0.060 | sy | 0.100 | sy |
| 503673  | 0.281 | sy |       |    |       |    |
| 7758    | 0.387 | sy | 0.795 | ad | 0.387 | sy |
| 70418   | 0.078 | sy | 0.150 | sy | 0.064 | sy |
| 206970  | 0.063 | sy | 0.017 | sy |       |    |
| 49258   |       |    | 0.250 | sy | 0.265 | sy |

|        |       |    |       |    |       |    |
|--------|-------|----|-------|----|-------|----|
| 33727  | 0.140 | sy | 0.465 | sy | 0.500 | sy |
| 194762 | 0.004 | sy | 0.005 | sy | 0.060 | sy |
| 28965  | 0.180 | sy | 0.593 | ad | 0.280 | sy |
| 91232  | 0.039 | sy | 0.039 | sy |       |    |
| 204577 | 0.094 | sy | 0.120 | sy |       |    |
| 204577 | 0.094 | sy | 0.120 | sy |       |    |
| 68381  | 0.018 | sy | 0.098 | sy | 0.099 | sy |
| 80228  | 0.049 | sy | 0.219 | sy | 0.398 | sy |
| 80198  | 0.031 | sy | 0.094 | sy | 0.141 | sy |
| 229534 | 0.188 | sy | 0.469 | sy | 0.199 | sy |
| 100343 | 0.375 | sy | 0.057 | sy |       |    |
| 113254 | 0.500 | sy | 0.075 | sy |       |    |
| 204600 | 0.018 | sy | 0.047 | sy |       |    |
| 69021  | 0.148 | sy | 0.020 | sy |       |    |
| 169441 | 0.125 | sy |       |    |       |    |
| 81018  | 0.053 | sy | 0.470 | sy |       |    |
| 71313  | 0.023 | sy | 0.026 | sy | 0.025 | sy |
| 33732  | 0.039 | sy | 0.688 | ad | 0.257 | sy |
| 58059  | 0.070 | sy | 0.750 | ad | 0.508 | sy |
| 91183  | 0.047 | sy | 0.059 | sy |       |    |
| 270320 | 0.180 | sy | 0.310 | sy | 0.250 | sy |
| 64048  | 0.188 | sy | 1.125 | in | 0.260 | sy |
| 148141 | 0.050 | sy | 0.015 | sy | 0.030 | sy |
| 199874 | 0.031 | sy | 0.030 | sy | 0.105 | sy |
| 164745 | 0.375 | sy |       |    |       |    |
| 182722 | 0.012 | sy | 0.009 | sy |       |    |
| 181431 | 0.003 | sy |       |    |       |    |
| 190759 | 0.008 | sy | 0.019 | sy | 0.018 | sy |
| 209208 | 0.059 | sy | 0.086 | sy |       |    |
| 62569  | 0.188 | sy | 0.435 | sy | 0.012 | sy |
| 63987  | 0.375 | sy | 0.688 | ad | 0.387 | sy |
| 48026  | 0.420 | sy | 0.469 | sy | 0.193 | sy |
| 199586 | 0.013 | sy | 0.009 | sy | 0.063 | sy |
| 89330  | 0.047 | sy | 0.099 | sy |       |    |
| 72532  | 0.469 | sy | 0.146 | sy | 0.190 | sy |
| 109531 | 0.030 | sy | 0.100 | sy | 0.030 | sy |
| 96720  | 0.004 | sy | 0.013 | sy | 0.030 | sy |

---

**Supplementary Table S2.** Results of antimicrobial combinations tested for *K. pneumoniae*. FICI: fractional inhibitory concentration index; cazavi: ceftazidime/avibactam; sy: synergy; ad: additivity; in: indifference; an: antagonism; MBL: metallo- $\beta$ -lactamase; KPC: *Klebsiella pneumoniae* carbapenemase.

| <i>K. pneumoniae</i><br>isolate accession<br>number | Phenotypically detected<br>resistance mechanism | <u>Antimicrobial combination</u>              |    |                                             |    |
|-----------------------------------------------------|-------------------------------------------------|-----------------------------------------------|----|---------------------------------------------|----|
|                                                     |                                                 | colistin + meropenem<br>FICI (interpretation) |    | cazavi + aztreonam<br>FICI (interpretation) |    |
| 5443                                                | MBL                                             | 0.313                                         | sy |                                             |    |
| 55261                                               | MBL                                             | 0.233                                         | sy |                                             |    |
| 67868                                               | MBL                                             | 0.92                                          | ad | 0.003                                       | sy |
| 75416                                               | MBL, KPC                                        | 0.172                                         | sy | 0.0007                                      | sy |
| 91223                                               | MBL                                             |                                               |    | 0.001                                       | sy |
| 93696                                               | MBL                                             |                                               |    | 0.023                                       | sy |
| 98970                                               | MBL, KPC                                        | 0.5                                           | sy | 0.01                                        | sy |
| 101784                                              | MBL                                             |                                               |    | 0.006                                       | sy |
| 103075                                              | MBL                                             | 0.75                                          | ad | 0.074                                       | sy |
| 102603                                              | MBL                                             | 0.5                                           | sy | 0.003                                       | sy |
| 105833                                              | MBL                                             | 0.5                                           | sy | 0.009                                       | sy |
| 106997                                              | MBL                                             | 0.5                                           | sy | 0.003                                       | sy |
| 108107                                              | MBL, KPC                                        |                                               |    | 0.003                                       | sy |
| 107528                                              | MBL, KPC                                        |                                               |    | 0.006                                       | sy |
| 113425                                              | MBL, KPC                                        | 0.375                                         | sy | 0.003                                       | sy |
| 118810                                              | MBL                                             | 0.375                                         | sy | 0.4                                         | sy |
| 118117                                              | MBL                                             | 0.5                                           | sy | 0.04                                        | sy |
| 120360                                              | MBL, KPC                                        | 0.5                                           | sy | 0.004                                       | sy |
| 122855                                              | MBL, KPC                                        | 0.75                                          | ad | 0.03                                        | sy |
| 130082                                              | MBL                                             | 0.75                                          | ad | 0.0008                                      | sy |
| 129338                                              | MBL                                             | 0.5                                           | sy | 0.001                                       | sy |
| 132171                                              | MBL                                             | 0.375                                         | sy | 0.009                                       | sy |
| 140735                                              | MBL                                             | 0.375                                         | sy | 0.004                                       | sy |
| 151864                                              | MBL, KPC                                        | 0.375                                         | sy | 0.003                                       | sy |
| 151628                                              | MBL, KPC                                        | 0.375                                         | sy | 0.007                                       | sy |
| 155646                                              | MBL                                             | 0.75                                          | ad | 0.048                                       | sy |
| 160399                                              | MBL                                             | 0.75                                          | ad | 0.097                                       | sy |
| 160782                                              | MBL, KPC                                        | 0.25                                          | sy | 1.56                                        | in |
| 161199                                              | MBL, KPC                                        | 0.5                                           | sy | 0.005                                       | sy |
| 162193                                              | MBL, KPC                                        | 0.375                                         | sy | 0.038                                       | sy |
| 162830                                              | KPC                                             | 0.313                                         | sy | 0.032                                       | sy |
| 166265                                              | MBL, KPC                                        | 0.5                                           | sy |                                             |    |
| 166123                                              | MBL, KPC                                        | 0.5                                           | sy | 0.01                                        | sy |
| 168860                                              | KPC                                             | 0.022                                         | sy |                                             |    |
| 179049                                              | MBL                                             | 0.375                                         | sy | 0.220                                       | sy |
| 181425                                              | KPC                                             | 0.047                                         | sy |                                             |    |
| 181671                                              | KPC                                             | 0.039                                         | sy |                                             |    |
| 181630                                              | MBL, KPC                                        | 0.047                                         | sy | 0.004                                       | sy |
| 184336                                              | MBL, KPC                                        | 0.100                                         | sy | 1.250                                       | in |
| 186706                                              | MBL, KPC                                        | 0.092                                         | sy | 0.029                                       | sy |
| 186399                                              | MBL, KPC                                        | 0.092                                         | sy | 0.018                                       | sy |
| 187704                                              | MBL, KPC                                        | 0.092                                         | sy | 0.029                                       | sy |
| 194419                                              | KPC                                             | 0.094                                         | sy | 0.06                                        | sy |
| 194761                                              | MBL, KPC                                        | 0.014                                         | sy | 0.014                                       | sy |
| 198183                                              | KPC                                             | 0.312                                         | sy | 0.126                                       | sy |
| 200308                                              | KPC                                             | 0.250                                         | sy | 0.500                                       | sy |
| 203868                                              | MBL                                             | 0.063                                         | sy | 0.001                                       | sy |
| 207584                                              | MBL                                             | 0.375                                         | sy | 0.005                                       | sy |
| 207651                                              | MBL                                             | 0.250                                         | sy | 0.015                                       | sy |

|        |          |       |    |       |    |
|--------|----------|-------|----|-------|----|
| 210453 | MBL, KPC |       |    | 0.034 | sy |
| 211308 | MBL      | 0.375 | sy | 0.004 | sy |
| 211364 | MBL      | 0.360 | sy | 0.007 | sy |
| 211319 | KPC      |       |    | 0.098 | sy |
| 211123 | MBL      | 0.281 | sy | 0.010 | sy |
| 212409 | MBL      | 0.469 | sy | 0.039 | sy |
| 214234 | MBL      | 0.188 | sy | 0.004 | sy |
| 217930 | MBL      |       |    | 0.013 | sy |
| 217801 | MBL      |       |    | 0.005 | sy |
| 218018 | MBL, KPC |       |    | 0.938 | ad |
| 218132 | MBL      |       |    | 0.007 | sy |
| 229673 | MBL      | 2.000 | in | 0.002 | sy |
| 236287 | MBL      |       |    | 0.005 | sy |
| 243606 | MBL      |       |    | 0.015 | sy |
| 259530 | MBL      | 0.313 | sy | 0.022 | sy |
| 263614 | MBL, KPC | 1.000 | in | 0.009 | sy |
| 263381 | MBL, KPC | 0.750 | ad | 0.009 | sy |
| 263301 | MBL      | 1.000 | in | 0.156 | sy |
| 270490 | MBL      | 0.500 | sy | 0.310 | sy |
| 274570 | MBL      | 0.750 | ad | 0.005 | sy |
| 276255 | MBL      | 0.750 | ad | 0.033 | sy |
| 279894 | MBL      | 1.500 | in | 0.029 | sy |
| 289041 | MBL      | 1.000 | in | 0.038 | sy |
| 2168   | MBL      | 0.375 | sy | 0.005 | sy |
| 6249   | MBL      | 0.750 | ad | 0.029 | sy |
| 5799   | MBL      | 1.000 | in | 0.003 | sy |
| 6265   | MBL      | 1.000 | in | 0.003 | sy |
| 7766   | MBL      | 0.500 | sy | 0.005 | sy |
| 12724  | MBL      |       |    | 0.938 | ad |
| 18504  | MBL      |       |    | 0.003 | sy |
| 19178  | KPC      |       |    | 0.126 | sy |
| 21250  | MBL      |       |    | 0.005 | sy |
| 21435  | MBL      |       |    | 0.005 | sy |
| 33720  | MBL, KPC | 0.120 | sy | 0.005 | sy |
| 33747  | MBL      | 0.078 | sy | 0.625 | ad |
| 39455  | MBL      | 0.421 | sy | 0.038 | sy |
| 48734  | MBL, KPC | 0.094 | sy | 0.005 | sy |
| 48687  | KPC      | 0.094 | sy | 0.126 | sy |
| 51340  | KPC      | 1.125 | in | 0.039 | sy |
| 53603  | MBL      |       |    | 0.005 | sy |
| 57305  | MBL      | 0.250 | sy | 0.014 | sy |
| 58608  | MBL      | 1.570 | in | 0.010 | sy |
| 61996  | MBL, KPC | 1.000 | in | 0.004 | sy |
| 66196  | MBL      | 0.750 | ad | 0.005 | sy |
| 69763  | MBL, KPC | 1.000 | in | 0.004 | sy |
| 74042  | MBL, KPC | 0.313 | sy | 1.875 | in |
| 75938  | MBL      | 0.938 | ad | 0.003 | sy |
| 82425  | MBL      | 0.139 | sy | 0.015 | sy |
| 84690  | MBL      | 0.188 | sy | 0.015 | sy |
| 88862  | KPC      | 0.375 | sy | 0.383 | sy |
| 89008  | MBL      | 0.069 | sy | 4.000 | in |
| 92029  | KPC      | 0.031 | sy | 0.024 | sy |
| 94340  | MBL      | 0.046 | sy | 0.005 | sy |
| 94561  | MBL      | 0.025 | sy | 0.051 | sy |
| 95924  | MBL      | 0.024 | sy | 0.030 | sy |
| 119233 | MBL      | 0.063 | sy | 0.094 | sy |
| 145639 | MBL      | 0.070 | sy | 0.020 | sy |
